# Supplementary material for: Comparison of the microwave absorption performance of core–shell SiO2@C and hollow carbon nanospheres with different sizes
Source: Royal Society of Chemistry journal article supplement (doi:10.1039/d2tc05255e), 2023-01-01
Supplement: d2tc05255e1.pdf [file d2tc05255e1.pdf]

## Comparison of the microwave absorption performance of core-shell SiO<sub>2</sub>@C and hollow carbon nanospheres with different sizes

Lu-Lu Han <sup>a</sup>, Wen-Wen Wu <sup>a,\*</sup>, Chao Yuan <sup>a</sup>, Zhuo Wang <sup>b</sup>, Xiao-Bin Zhou <sup>a</sup>,  
Chen-Xiao Ming <sup>a</sup>, Peng Liu <sup>a,\*</sup>

<sup>a</sup>School of Physics and Information Technology, Shaanxi Normal University, Xi'an 710062, China.

<sup>b</sup>School of Material Science and Engineering, Chang'an University, Xi'an, 710064, China

\*Corresponding author. Tel: 86-15829628163. E-mail: wenwen\_wu@snnu.edu.cn\_ (Wen-Wen Wu), liupeng@snnu.edu.cn (P. Liu)

The density of void@C can be calculated by  $m/V$ . As shown in Fig 1S, it is 0.053g/cm<sup>3</sup>.

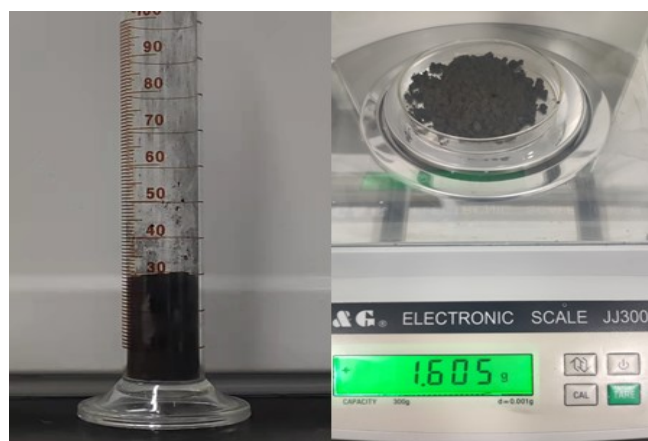

**Fig. 1S** Density measurement of void@C
